# Supplementary material
Source: publisher figshare collection journal article supplement (https://gsajournals.figshare.com/ndownloader/files/13687634)
Supplement: Supplementary file 1 [file 13687634]

## Sheet: SE±0.5 mg_Oli_72h
Strain	ratio (SE±Oli 0.5mg/L_72h)	ens2	ORF length/functionality			ens2 present vs absent
yjm1078	0.0585452	Present	Full-length/func		Mann-Whitney U-test: The Z-Score is -6.51544. The p-value is < .00001. The result is significant at p < .05.
yjm1242	0	Present	Full-length/func
yjm1252	0.866616	Present	Full-length/func
yjm1273	0.175166	Present	Full-length/func
yjm1342	0	Present	Full-length/func
yjm1356	0.0156931	Present	Full-length/func
yjm1387	0.0507442	Present	Full-length/func
yjm1402	0.0769358	Present	Full-length/func
yjm1434	0.120034	Present	Full-length/func			ENS2 full-length vs ens2 (truncated) + absent
yjm1443	0.939563	Present	Full-length/func		Mann-Whitney U-test:The Z-Score is 1.84332. The p-value is .06576. The result is not significant at p < .05.
yjm1463	0.123486	Present	Full-length/func
yjm1477	0.0582041	Present	Full-length/func
yjm1478	0.00099635	Present	Full-length/func
yjm1527	0.32806	Present	Full-length/func
yjm1573	0.00892758	Present	Full-length/func
yjm627	0.950927	Present	Full-length/func
yjm1083	0	Present	Truncated/non-func
yjm1133	0.39714	Present	Truncated/non-func			ENS2 full-length vs ens2 (truncated)
yjm1190	0.750764	Present	Truncated/non-func		Mann-Whitney U-test:The Z-Score is -0.61936. The p-value is .53526. The result is not significant at p < .05.
yjm1199	0	Present	Truncated/non-func
yjm1202	0.0320915	Present	Truncated/non-func
yjm1208	0.0838507	Present	Truncated/non-func
yjm1244	0	Present	Truncated/non-func
yjm1250	0.796833	Present	Truncated/non-func
yjm1304	0.654991	Present	Truncated/non-func
yjm1311	0.725603	Present	Truncated/non-func
yjm1326	0	Present	Truncated/non-func
yjm1332	0	Present	Truncated/non-func
yjm1336	0	Present	Truncated/non-func
yjm1338	0.193013	Present	Truncated/non-func
yjm1341	0.660144	Present	Truncated/non-func
yjm1355	0	Present	Truncated/non-func
yjm1383	0	Present	Truncated/non-func
yjm1385	0.0106784	Present	Truncated/non-func
yjm1399	0.000529657	Present	Truncated/non-func
yjm1400	0.100598	Present	Truncated/non-func
yjm1417	0.325303	Present	Truncated/non-func
yjm1433	0.113685	Present	Truncated/non-func
yjm1444	0.0257138	Present	Truncated/non-func
yjm1479	0	Present	Truncated/non-func
yjm1615/yjm1628	0	Present	Truncated/non-func
yjm189	0	Present	Truncated/non-func
yjm193	0	Present	Truncated/non-func
yjm244	0	Present	Truncated/non-func
yjm248	0	Present	Truncated/non-func
yjm271	0	Present	Truncated/non-func
yjm320	0.747073	Present	Truncated/non-func
yjm326	1.31785	Present	Truncated/non-func
yjm428	0	Present	Truncated/non-func
yjm450	0.0206799	Present	Truncated/non-func
yjm451	0.356393	Present	Truncated/non-func
yjm453	0.462721	Present	Truncated/non-func
yjm456	0.489291	Present	Truncated/non-func
yjm541	0.533529	Present	Truncated/non-func
yjm554	0.00968012	Present	Truncated/non-func
yjm555	0.912935	Present	Truncated/non-func
yjm681	0.842682	Present	Truncated/non-func
yjm682	0.131752	Present	Truncated/non-func
yjm683	0.708536	Present	Truncated/non-func
yjm689	0	Present	Truncated/non-func
yjm693	0.745345	Present	Truncated/non-func
yjm789	0.573425	Present	Truncated/non-func
s288c	1.24495	Absent
sk1	1.05832	Absent
yjm1129	0.883798	Absent
yjm1248	1.03093	Absent
yjm1307	1.01923	Absent
yjm1381	1.04687	Absent
yjm1386	0.991549	Absent
yjm1388	1.16093	Absent
yjm1389	1.18945	Absent
yjm1401	0.906389	Absent
yjm1415	0.541632	Absent
yjm1418	1.27422	Absent
yjm1419	1.21388	Absent
yjm1439	0.970833	Absent
yjm1447	1.31396	Absent
yjm1450	1.25836	Absent
yjm1460	0.90782	Absent
yjm1526	0.648134	Absent
yjm1549	1.17775	Absent
yjm1574	1.22217	Absent
yjm1592	1.12453	Absent
yjm195	1.31037	Absent
yjm270	1.34403	Absent
yjm470	2.83798	Absent
yjm969	0.87851	Absent
yjm972	0.442017	Absent
yjm975	0.692535	Absent
yjm978	0.627321	Absent
yjm981	0.712036	Absent
yjm984	0.63851	Absent
yjm987	0.472061	Absent
yjm990	0.539146	Absent
yjm993	0.677457	Absent
yjm996	0.100946	Absent

## Sheet: SE±0.5 mg_Oli_96h
Strain	ratio (SE±Oli 0.5mg/L_96h)	ens2	ORF length/functionality			ens2 present vs absent
yjm1078	0.284325	Present	Full-length/func		Mann-Whitney U-test:The Z-Score is -6.66865. The p-value is < .00001. The result is significant at p < .05.
yjm1242	0	Present	Full-length/func
yjm1252	1.09745	Present	Full-length/func
yjm1273	0.554614	Present	Full-length/func
yjm1342	0	Present	Full-length/func
yjm1356	0.304514	Present	Full-length/func
yjm1387	0.573775	Present	Full-length/func
yjm1402	0.435711	Present	Full-length/func
yjm1434	0.572869	Present	Full-length/func			ENS2 full-length vs ens2 (truncated) + absent
yjm1443	1.05668	Present	Full-length/func		Mann-Whitney U-test:The Z-Score is 1.81383. The p-value is .0703. The result is not significant at p < .05.
yjm1463	0.711384	Present	Full-length/func
yjm1477	0.539065	Present	Full-length/func
yjm1478	0.129182	Present	Full-length/func
yjm1527	0.692656	Present	Full-length/func
yjm1573	0.418013	Present	Full-length/func
yjm627	1.09716	Present	Full-length/func
yjm1083	0	Present	Truncated/non-func
yjm1133	0.844961	Present	Truncated/non-func			ENS2 full-length vs ens2 (truncated)
yjm1190	0.974192	Present	Truncated/non-func		Mann-Whitney U-test:The Z-Score is -0.68371. The p-value is .4965. The result is not significant at p < .05.
yjm1199	0.00167403	Present	Truncated/non-func
yjm1202	0.388555	Present	Truncated/non-func
yjm1208	0.660485	Present	Truncated/non-func
yjm1244	0	Present	Truncated/non-func
yjm1250	0.983797	Present	Truncated/non-func
yjm1304	0.835782	Present	Truncated/non-func
yjm1311	0.953139	Present	Truncated/non-func
yjm1326	0.010886	Present	Truncated/non-func
yjm1332	0.000755706	Present	Truncated/non-func
yjm1336	0.00355494	Present	Truncated/non-func
yjm1338	0.598506	Present	Truncated/non-func
yjm1341	0.877919	Present	Truncated/non-func
yjm1355	0	Present	Truncated/non-func
yjm1383	0.118315	Present	Truncated/non-func
yjm1385	0.226196	Present	Truncated/non-func
yjm1399	0.0277921	Present	Truncated/non-func
yjm1400	0.275105	Present	Truncated/non-func
yjm1417	0.721268	Present	Truncated/non-func
yjm1433	0.622732	Present	Truncated/non-func
yjm1444	0.448477	Present	Truncated/non-func
yjm1479	0	Present	Truncated/non-func
yjm1615/yjm1628	0.00156483	Present	Truncated/non-func
yjm189	0.00307167	Present	Truncated/non-func
yjm193	0	Present	Truncated/non-func
yjm244	0	Present	Truncated/non-func
yjm248	0.00288593	Present	Truncated/non-func
yjm271	0	Present	Truncated/non-func
yjm320	0.936695	Present	Truncated/non-func
yjm326	1.44685	Present	Truncated/non-func
yjm428	0.00174197	Present	Truncated/non-func
yjm450	0.0804929	Present	Truncated/non-func
yjm451	0.688176	Present	Truncated/non-func
yjm453	0.82897	Present	Truncated/non-func
yjm456	0.704573	Present	Truncated/non-func
yjm541	0.85918	Present	Truncated/non-func
yjm554	0.114472	Present	Truncated/non-func
yjm555	1.12322	Present	Truncated/non-func
yjm681	0.937185	Present	Truncated/non-func
yjm682	0.316585	Present	Truncated/non-func
yjm683	0.949107	Present	Truncated/non-func
yjm689	0	Present	Truncated/non-func
yjm693	1.05409	Present	Truncated/non-func
yjm789	0.753964	Present	Truncated/non-func
s288c	1.45968	Absent
sk1	1.25226	Absent
yjm1129	0.970333	Absent
yjm1248	1.25721	Absent
yjm1307	1.12926	Absent
yjm1381	1.31637	Absent
yjm1386	1.34216	Absent
yjm1388	1.42389	Absent
yjm1389	1.38318	Absent
yjm1401	1.05234	Absent
yjm1415	0.772496	Absent
yjm1418	1.36374	Absent
yjm1419	1.36952	Absent
yjm1439	1.18496	Absent
yjm1447	1.47957	Absent
yjm1450	1.31521	Absent
yjm1460	1.00343	Absent
yjm1526	0.930326	Absent
yjm1549	1.27864	Absent
yjm1574	1.45103	Absent
yjm1592	1.26726	Absent
yjm195	1.44432	Absent
yjm270	1.48657	Absent
yjm470	5.03974	Absent
yjm969	1.06458	Absent
yjm972	0.823494	Absent
yjm975	0.908061	Absent
yjm978	0.927193	Absent
yjm981	0.885755	Absent
yjm984	0.913381	Absent
yjm987	0.882372	Absent
yjm990	0.950557	Absent
yjm993	0.882911	Absent
yjm996	0.745234	Absent

## Sheet: YPE±1 mg Oli_24h
Strain	ratio (YPE±Oli 1mg/L_24h)	ens2	ORF length/functionality			ens2 present vs absent
yjm1078	0.0309541	Present	Full-length/func		Mann-Whitney U-test:The Z-Score is -6.37761. The p-value is < .00001. The result is significant at p < .05.
yjm1242	0.387912	Present	Full-length/func
yjm1252	0.0208201	Present	Full-length/func
yjm1273	0.242624	Present	Full-length/func
yjm1342	0.00123063	Present	Full-length/func
yjm1356	0.000575899	Present	Full-length/func
yjm1387	0.00628875	Present	Full-length/func
yjm1402	0.0224284	Present	Full-length/func
yjm1434	0.428449	Present	Full-length/func			ENS2 full-length vs ens2 (truncated) + absent
yjm1443	0.484421	Present	Full-length/func		Mann-Whitney U-test:The Z-Score is 1.90437. The p-value is .05744. The result is not significant at p < .05.
yjm1463	0.108613	Present	Full-length/func
yjm1477	0.0161599	Present	Full-length/func
yjm1478	0.0346682	Present	Full-length/func
yjm1527	0.00166755	Present	Full-length/func
yjm1573	0.0392208	Present	Full-length/func
yjm627	0.00375545	Present	Full-length/func
yjm1083	0.00577668	Present	Truncated/non-func
yjm1133	0.228639	Present	Truncated/non-func			ENS2 full-length vs ens2 (truncated)
yjm1190	0.494462	Present	Truncated/non-func		Mann-Whitney U-test:The Z-Score is -0.41809. The p-value is .67448. The result is not significant at p < .05.
yjm1199	0.00777314	Present	Truncated/non-func
yjm1202	0.00702184	Present	Truncated/non-func
yjm1208	0.000547521	Present	Truncated/non-func
yjm1244	0.000590696	Present	Truncated/non-func
yjm1250	0.0221393	Present	Truncated/non-func
yjm1304	0.220084	Present	Truncated/non-func
yjm1311	0.0262861	Present	Truncated/non-func
yjm1326	0.00165446	Present	Truncated/non-func
yjm1332	0.133809	Present	Truncated/non-func
yjm1336	0.00086473	Present	Truncated/non-func
yjm1338	0.00177456	Present	Truncated/non-func
yjm1341	0.0721462	Present	Truncated/non-func
yjm1355	0.00122542	Present	Truncated/non-func
yjm1383	Inf	Present	Truncated/non-func
yjm1385	0.0159032	Present	Truncated/non-func
yjm1399	0.0302168	Present	Truncated/non-func
yjm1400	0.0342673	Present	Truncated/non-func
yjm1417	0.356089	Present	Truncated/non-func
yjm1433	0.00066612	Present	Truncated/non-func
yjm1444	0.000455148	Present	Truncated/non-func
yjm1479	0.00172012	Present	Truncated/non-func
yjm1615/yjm1628	0.00116004	Present	Truncated/non-func
yjm189	0.00447261	Present	Truncated/non-func
yjm193	0.000490695	Present	Truncated/non-func
yjm244	0.00220153	Present	Truncated/non-func
yjm248	0.0198629	Present	Truncated/non-func
yjm271	0.00396431	Present	Truncated/non-func
yjm320	0.139903	Present	Truncated/non-func
yjm326	0.864388	Present	Truncated/non-func
yjm428	0.0319071	Present	Truncated/non-func
yjm450	0.000189322	Present	Truncated/non-func
yjm451	0.26468	Present	Truncated/non-func
yjm453	0.110703	Present	Truncated/non-func
yjm456	0.489221	Present	Truncated/non-func
yjm541	0.107703	Present	Truncated/non-func
yjm554	0.0103243	Present	Truncated/non-func
yjm555	0.316845	Present	Truncated/non-func
yjm681	0.126244	Present	Truncated/non-func
yjm682	0.308	Present	Truncated/non-func
yjm683	0.365701	Present	Truncated/non-func
yjm689	0.00812839	Present	Truncated/non-func
yjm693	0.0879448	Present	Truncated/non-func
yjm789	0.865552	Present	Truncated/non-func
s288c	0.97798	Absent
sk1	0.27599	Absent
yjm1129	0.997311	Absent
yjm1248	0.00885933	Absent
yjm1307	1.01574	Absent
yjm1381	0.969733	Absent
yjm1386	0.378187	Absent
yjm1388	1.14487	Absent
yjm1389	1.13414	Absent
yjm1401	0.169161	Absent
yjm1415	0.259246	Absent
yjm1418	1.09018	Absent
yjm1419	1.08387	Absent
yjm1439	0.000947723	Absent
yjm1447	1.02251	Absent
yjm1450	0.774309	Absent
yjm1460	0.743056	Absent
yjm1526	0.533125	Absent
yjm1549	0.788214	Absent
yjm1574	0.976161	Absent
yjm1592	1.05048	Absent
yjm195	1.05761	Absent
yjm270	0.00121509	Absent
yjm470	2.18146	Absent
yjm969	0.805247	Absent
yjm972	0.723728	Absent
yjm975	0.829727	Absent
yjm978	0.726271	Absent
yjm981	0.640013	Absent
yjm984	0.771701	Absent
yjm987	0.772806	Absent
yjm990	0.808791	Absent
yjm993	0.837004	Absent
yjm996	0.722374	Absent

## Sheet: YPE±1 mg Oli_48h
Strain	ratio (YPE±Oli 1mg/L_48h)	ens2	ORF length/functionality			ens2 present vs absent
yjm1078	0.00121039	Present	Full-length/func		Mann-Whitney U-test:The Z-Score is -7.41791. The p-value is < .00001. The result is significant at p < .05.
yjm1242	0	Present	Full-length/func
yjm1252	0.0140909	Present	Full-length/func
yjm1273	0.489798	Present	Full-length/func
yjm1342	0	Present	Full-length/func
yjm1356	0.000475535	Present	Full-length/func
yjm1387	0.00361337	Present	Full-length/func
yjm1402	0.152195	Present	Full-length/func
yjm1434	0.62772	Present	Full-length/func			ENS2 full-length vs ens2 (truncated) + absent
yjm1443	0.619714	Present	Full-length/func		Mann-Whitney U-test:The Z-Score is 1.96403. The p-value is .05. The result is not significant at p < .05.
yjm1463	0.0251307	Present	Full-length/func
yjm1477	0.205202	Present	Full-length/func
yjm1478	0.0263241	Present	Full-length/func
yjm1527	0.00193556	Present	Full-length/func
yjm1573	0.0306819	Present	Full-length/func
yjm627	0.00030581	Present	Full-length/func
yjm1083	0	Present	Truncated/non-func			ENS2 full-length vs ens2 (truncated)
yjm1133	0.361859	Present	Truncated/non-func		Mann-Whitney U-test:The Z-Score is -1.00833. The p-value is .3125. The result is not significant at p < .05.
yjm1190	0.525734	Present	Truncated/non-func
yjm1199	0	Present	Truncated/non-func
yjm1202	0.00282766	Present	Truncated/non-func
yjm1208	0	Present	Truncated/non-func
yjm1244	0	Present	Truncated/non-func
yjm1250	0.0173776	Present	Truncated/non-func
yjm1304	0.728421	Present	Truncated/non-func
yjm1311	0.00335492	Present	Truncated/non-func
yjm1326	0	Present	Truncated/non-func
yjm1332	0.00305076	Present	Truncated/non-func
yjm1336	0	Present	Truncated/non-func
yjm1338	0	Present	Truncated/non-func
yjm1341	0.450956	Present	Truncated/non-func
yjm1355	0	Present	Truncated/non-func
yjm1383	NA	Present	Truncated/non-func
yjm1385	0.000312914	Present	Truncated/non-func
yjm1399	0	Present	Truncated/non-func
yjm1400	0.147238	Present	Truncated/non-func
yjm1417	0.386684	Present	Truncated/non-func
yjm1433	0	Present	Truncated/non-func
yjm1444	0.00362499	Present	Truncated/non-func
yjm1479	0	Present	Truncated/non-func
yjm1615/yjm1628	0	Present	Truncated/non-func
yjm189	0	Present	Truncated/non-func
yjm193	0	Present	Truncated/non-func
yjm244	0	Present	Truncated/non-func
yjm248	0.000962227	Present	Truncated/non-func
yjm271	0	Present	Truncated/non-func
yjm320	0.0856984	Present	Truncated/non-func
yjm326	1.25154	Present	Truncated/non-func
yjm428	0	Present	Truncated/non-func
yjm450	0	Present	Truncated/non-func
yjm451	0.252761	Present	Truncated/non-func
yjm453	0.0603121	Present	Truncated/non-func
yjm456	0.553671	Present	Truncated/non-func
yjm541	0.381238	Present	Truncated/non-func
yjm554	0.0029035	Present	Truncated/non-func
yjm555	0.796152	Present	Truncated/non-func
yjm681	0.10052	Present	Truncated/non-func
yjm682	0.00969963	Present	Truncated/non-func
yjm683	0.630646	Present	Truncated/non-func
yjm689	0	Present	Truncated/non-func
yjm693	0.0260178	Present	Truncated/non-func
yjm789	0.985664	Present	Truncated/non-func
s288c	1.6139	Absent
sk1	0.495793	Absent
yjm1129	1.42654	Absent
yjm1248	0.700306	Absent
yjm1307	1.3801	Absent
yjm1381	1.78287	Absent
yjm1386	0.737224	Absent
yjm1388	1.70632	Absent
yjm1389	1.61642	Absent
yjm1401	0.290561	Absent
yjm1415	0.562937	Absent
yjm1418	1.51455	Absent
yjm1419	2.70044	Absent
yjm1439	0.815719	Absent
yjm1447	1.57705	Absent
yjm1450	0.977688	Absent
yjm1460	0.907947	Absent
yjm1526	0.880893	Absent
yjm1549	1.19785	Absent
yjm1574	1.21069	Absent
yjm1592	1.4657	Absent
yjm195	1.48326	Absent
yjm270	0.0846398	Absent
yjm470	17.3728	Absent
yjm969	1.06476	Absent
yjm972	0.947143	Absent
yjm975	1.31155	Absent
yjm978	0.898324	Absent
yjm981	0.80109	Absent
yjm984	0.969279	Absent
yjm987	1.04472	Absent
yjm990	1.12475	Absent
yjm993	1.0415	Absent
yjm996	0.875699	Absent
